# Supplementary material for: Expectation modulates repetition priming under high stimulus variability
Source: PubMed Central journal article supplement — J Vis. 2017 Jun 15;17(6):10. doi: 10.1167/17.6.10 (PMC5477629; doi:10.1167/17.6.10), 2017-06-15
Supplement: jovi-17-06-09_s01.pdf [file jovi-17-06-09_s01.pdf]

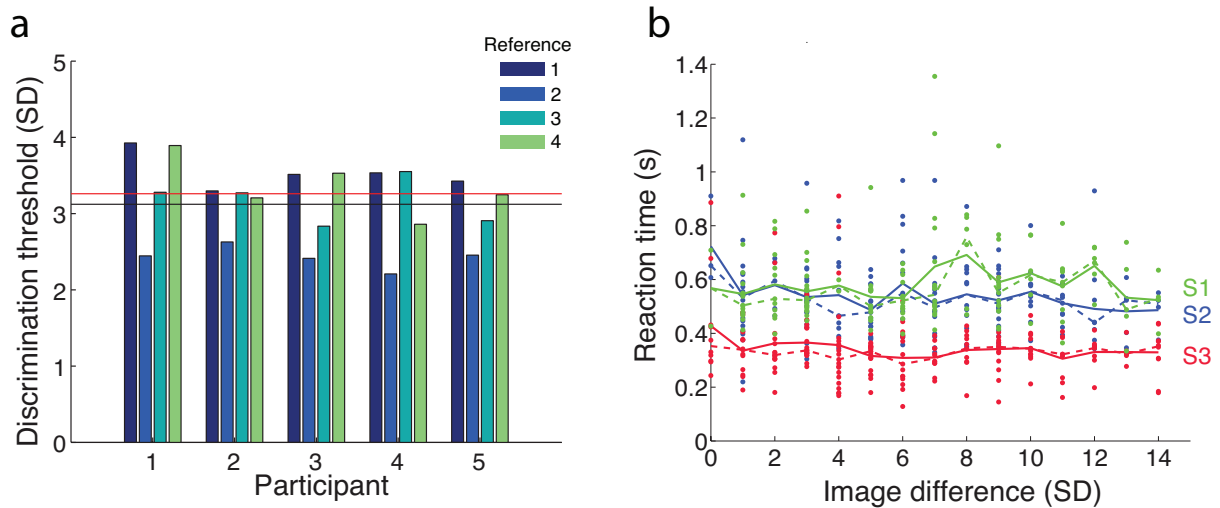

Figure S1: **Behavioral norming experiment.** a) 70% discrimination thresholds are shown for five participants. Colors indicate the four different face references used, which were selected in random vector directions around the origin of the FaceGen space. The black and red lines show the mean and median threshold across participants and references, respectively. b) Reaction times to respond “different identity” in a go-nogo identity judgment task for three participants and for 14 levels of image difference. Each point is the RT for one reference-test pair. The solid lines show the median and mean reaction times, respectively, for each level of stimulus difference between the reference and test. There were some “different” responses even for a zero image difference, likely due to after-effects caused by the fact that the faces were compared with a short temporal delay; however, “different” responses decreased monotonically with increasing stimulus difference (not shown).
